# Supplementary material for: Therapeutic effects of anti-CD154 antibody in cynomolgus monkeys with advanced rheumatoid arthritis
Source: PubMed Central journal article supplement (PMC5794761; doi:10.1038/s41598-018-20566-z), 2018-02-01
Supplement: 41598_2018_20566_MOESM1_ESM.pdf [file 41598_2018_20566_MOESM1_ESM.pdf]

# Supplementary information

## Title:

**Therapeutic effects of anti-CD154 antibody in cynomolgus monkeys with advanced rheumatoid arthritis**

## Authors:

Eun Wha Choi<sup>1,\*</sup>, Kyo Won Lee<sup>2</sup>, Hyojun Park<sup>2</sup>, Hwajung Kim<sup>3</sup>, Jong Hyun Lee<sup>4</sup>, Ji Woo Song<sup>4,5</sup>, Jehoon Yang<sup>5</sup>, Yeongbeen Kwon<sup>6</sup>, Tae Min Kim<sup>7</sup>, Jae Berm Park<sup>2</sup>, Sungjoo Kim<sup>2,4,\*</sup>

<sup>1</sup>Department of Veterinary Clinical Pathology, College of Veterinary Medicine & Institute of Veterinary Science, Kangwon National University, 1 Kangwondaehak-gil, Chuncheon-si, Gangwon-do, 24341, Republic of Korea

<sup>2</sup>Department of Surgery, Division of Transplantation, Samsung Medical Center, Sungkyunkwan University School of Medicine, 81 Irwon-ro, Gangnam-gu, Seoul, 06351, Republic of Korea

<sup>3</sup>Department of Surgery, Seoul National University College of Medicine, 101 Daehak-ro, Jongno-gu, Seoul, 03080, Republic of Korea.

<sup>4</sup>Transplantation Research Center, Samsung Biomedical Research Institute, Samsung Medical Center, 81 Irwon-ro, Gangnam-gu, Seoul, 06351, Republic of Korea

<sup>5</sup>Laboratory Animal Research Center, Samsung Biomedical Research Institute, Samsung Medical Center, 81 Irwon-ro, Gangnam-gu, Seoul, 06351, Republic of Korea

<sup>6</sup> Department of Health Science and Technology, Samsung Advanced Institute for Health Sciences & Technology (SAIHST), Sungkyunkwan University, 81 Irwon-ro, Gangnam-gu, Seoul, 06351, Republic of Korea

<sup>7</sup>Graduate School of International Agricultural Technology and Institute of Green-Bio Science and Technology, Seoul National University, Pyeongchang, Gangwon-do, 25354, South Korea

\*Corresponding author: Eun Wha Choi, DVM, PhD, Assistant Professor

Address: Department of Veterinary Clinical Pathology, College of Veterinary Medicine, Kangwon National University, 1 Kangwondaehak-gil, Chuncheon-si, Gangwon-do 24341, Republic of Korea

Telephone: 82-33-250-8794, Fax: 82-33-259-5625

E-mail: [ewchoi@kangwon.ac.kr](mailto:ewchoi@kangwon.ac.kr)

\*Corresponding author: Sung Joo Kim, MD, PhD, Professor

Department of Surgery, Division of Transplantation, Samsung Medical Center, Sungkyunkwan University School of Medicine, 81 Irwon-ro, Gangnam-gu, Seoul 135-710, Republic of Korea

Telephone: 82-2-3410-3476

Fax: 82-2-3410-0040

E-mail: [kmhyj111@gmail.com](mailto:kmhyj111@gmail.com)

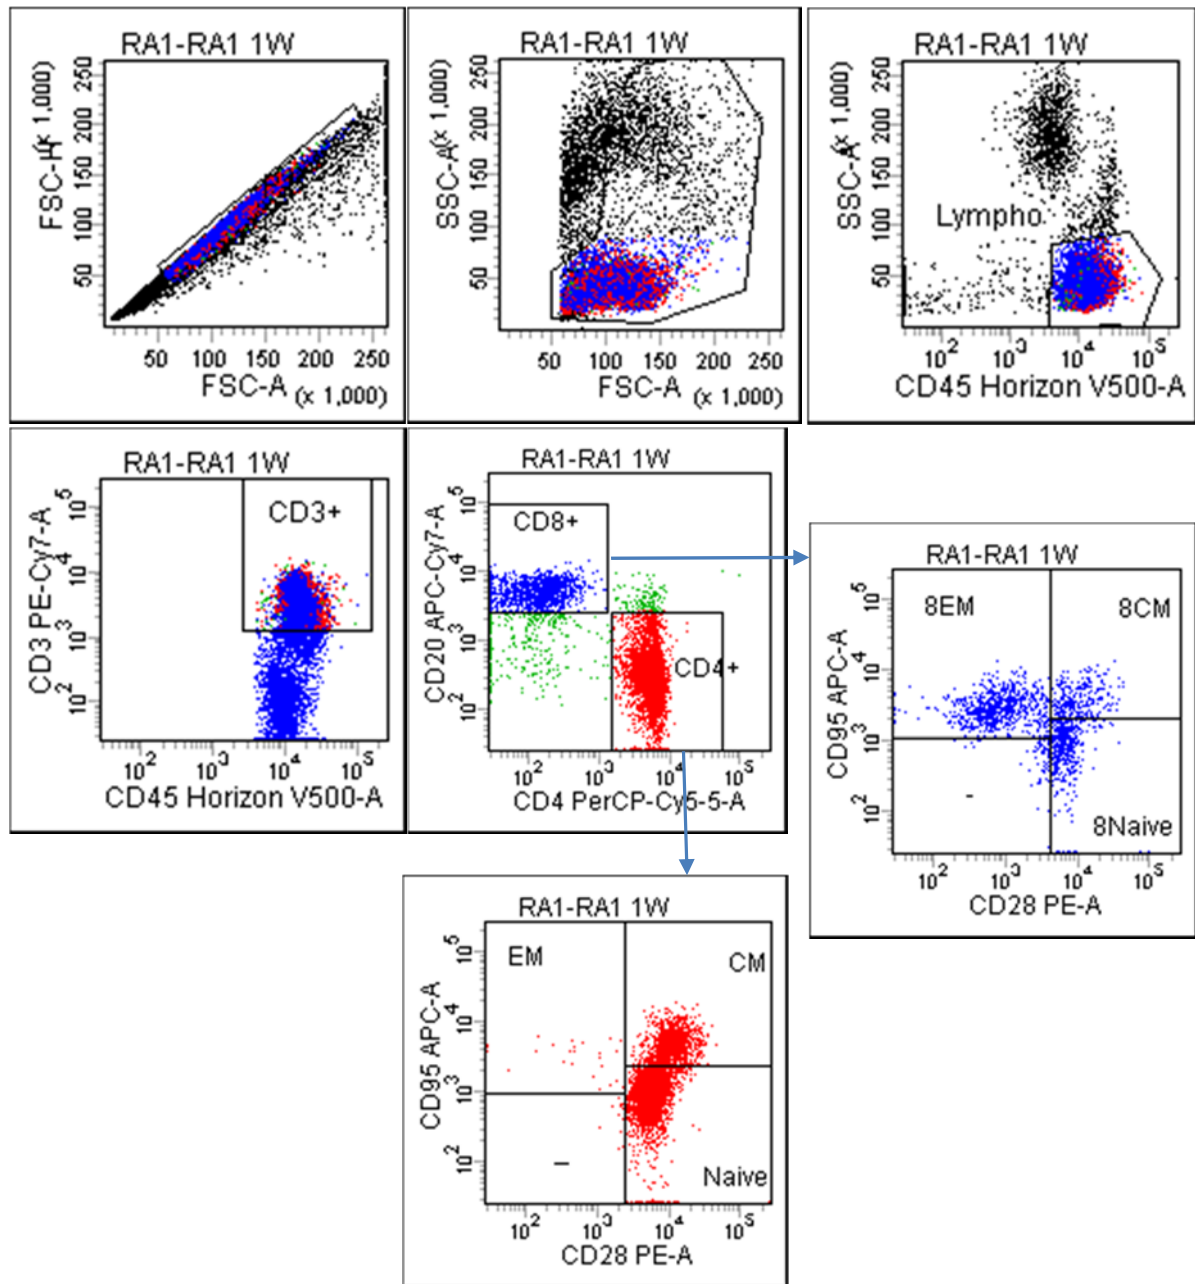

**Supplementary Figure 1. A representative gating scheme of the T cell subset in the peripheral blood.** For analysis of T-cell populations, peripheral blood mononuclear cells (PBMCs) were stained with V500-conjugated anti-CD45 (BD Biosciences), PE-Cy7-conjugated anti-CD3, PerCP-Cy5.5-conjugated anti-CD4, APC-Cy7-conjugated anti-CD8, PE-conjugated anti-CD28, and APC-conjugated anti-CD95 antibodies. EM: CD4 effector memory cell, CM: CD4 central memory cell, Naive: CD4 naïve T cell, 8EM: CD8 effector memory cell, 8CM: CD8 central memory cell, 8Naive: CD8 naïve T cell

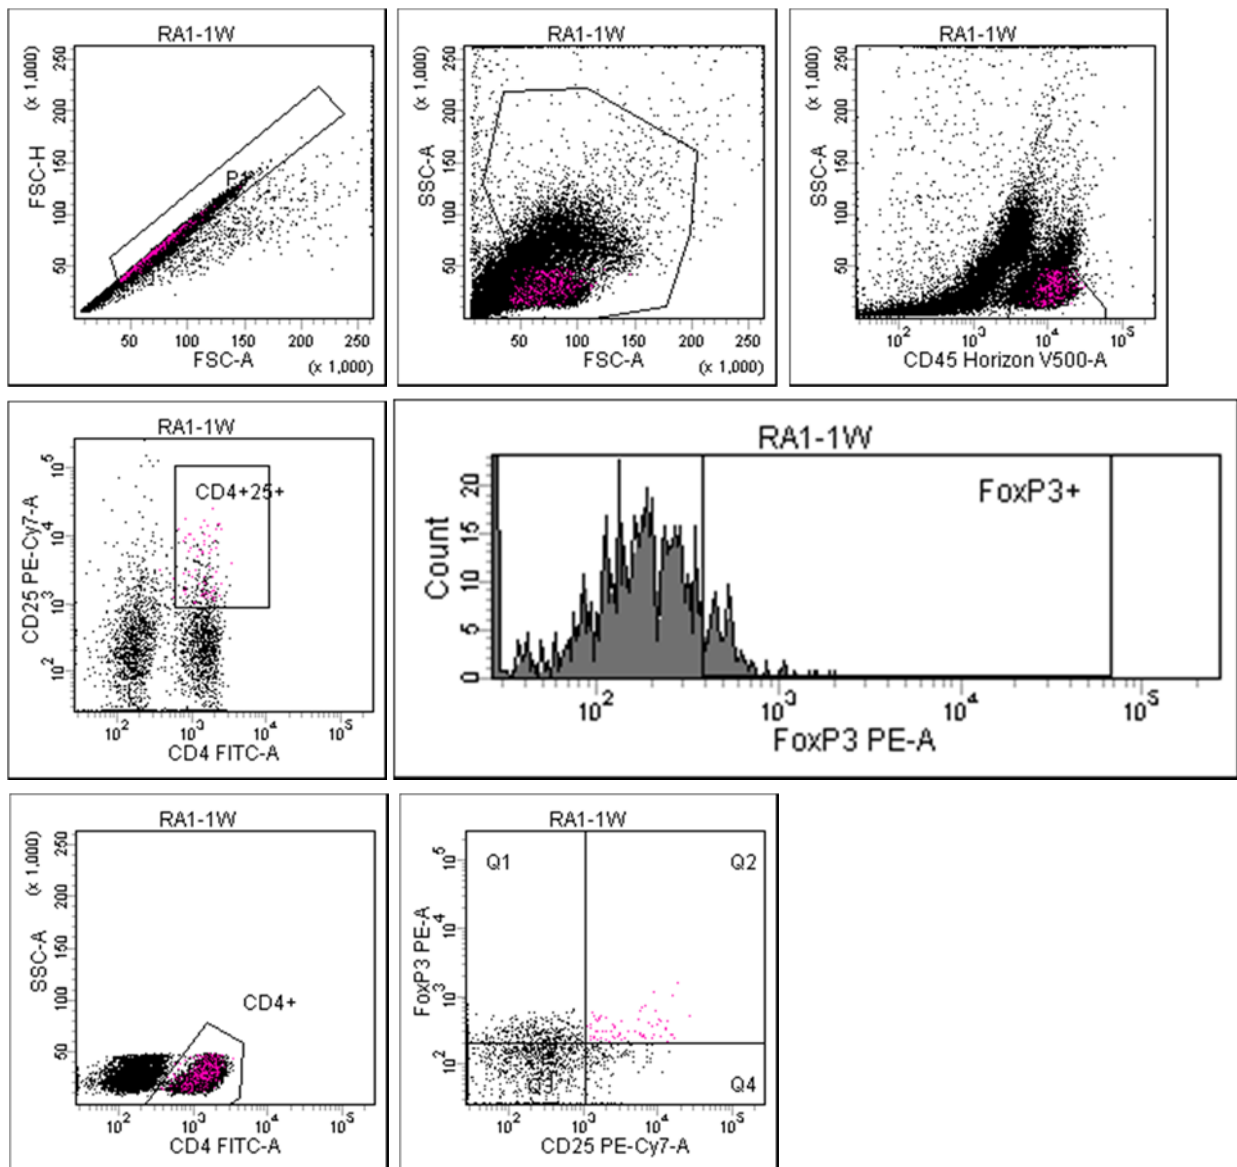

**Supplementary Figure 2. A representative gating scheme of the regulatory T cells in the peripheral blood.** For analysis of regulatory T cells, PBMCs were stained with V500-conjugated anti-CD45, FITC-conjugated anti-CD4, PE-Cy7-conjugated anti-CD25, and PE-conjugated anti-FoxP3 antibodies.

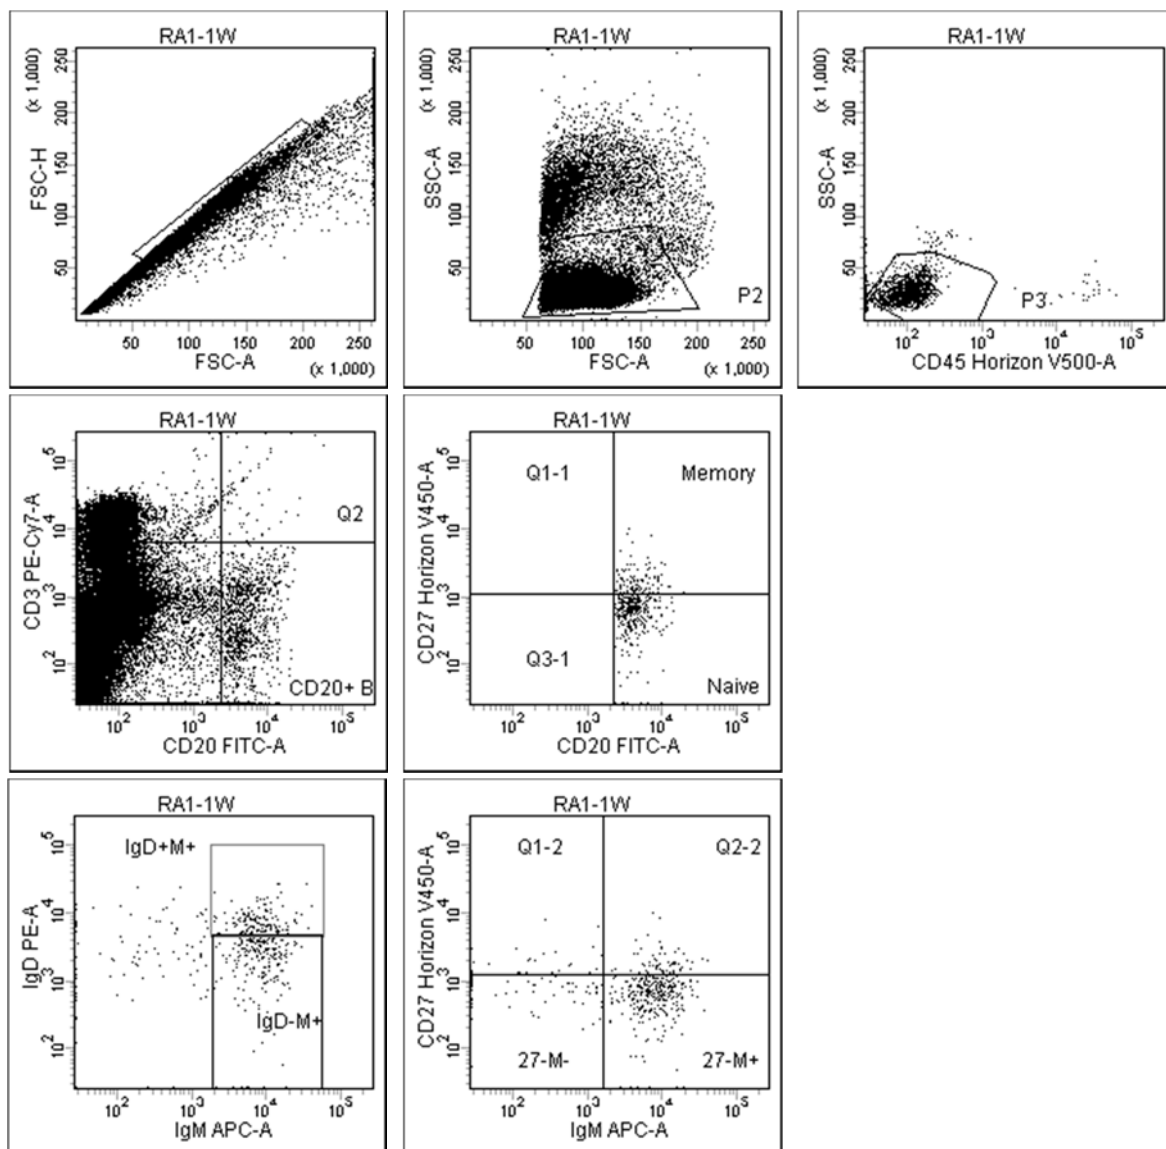

**Supplementary Figure 3. A representative gating scheme of the B cell subset in the peripheral blood.** For analysis of B-cell populations, PBMCs were stained with V500–conjugated CD45, PE-cy7–conjugated anti-CD3, FITC–conjugated anti-CD20, V450–conjugated anti-CD27, PerCP-Cy5.5–conjugated anti-CD21, PE–conjugated anti-IgD, and APC–conjugated anti-IgM antibodies.
